# Supplementary material for: ComBat Harmonization With and Without Empirical Bayes Estimation for Resting-State Functional Connectivity in Pediatric Mild Traumatic Brain Injury: a CARE4Kids Study
Source: Research Square preprint supplement (doi:10.21203/rs.3.rs-9418750/v1), 2026-05-06
Supplement: Supplementary file 1 [file c2b386c7b4f531435e3cad48.docx]

# 7 Supplementary Material

## 7.1 Supplementary Figures

### 7.1.1 Supplementary Figure 1: Within-Site Consistency Across Resting-State Networks After Harmonization


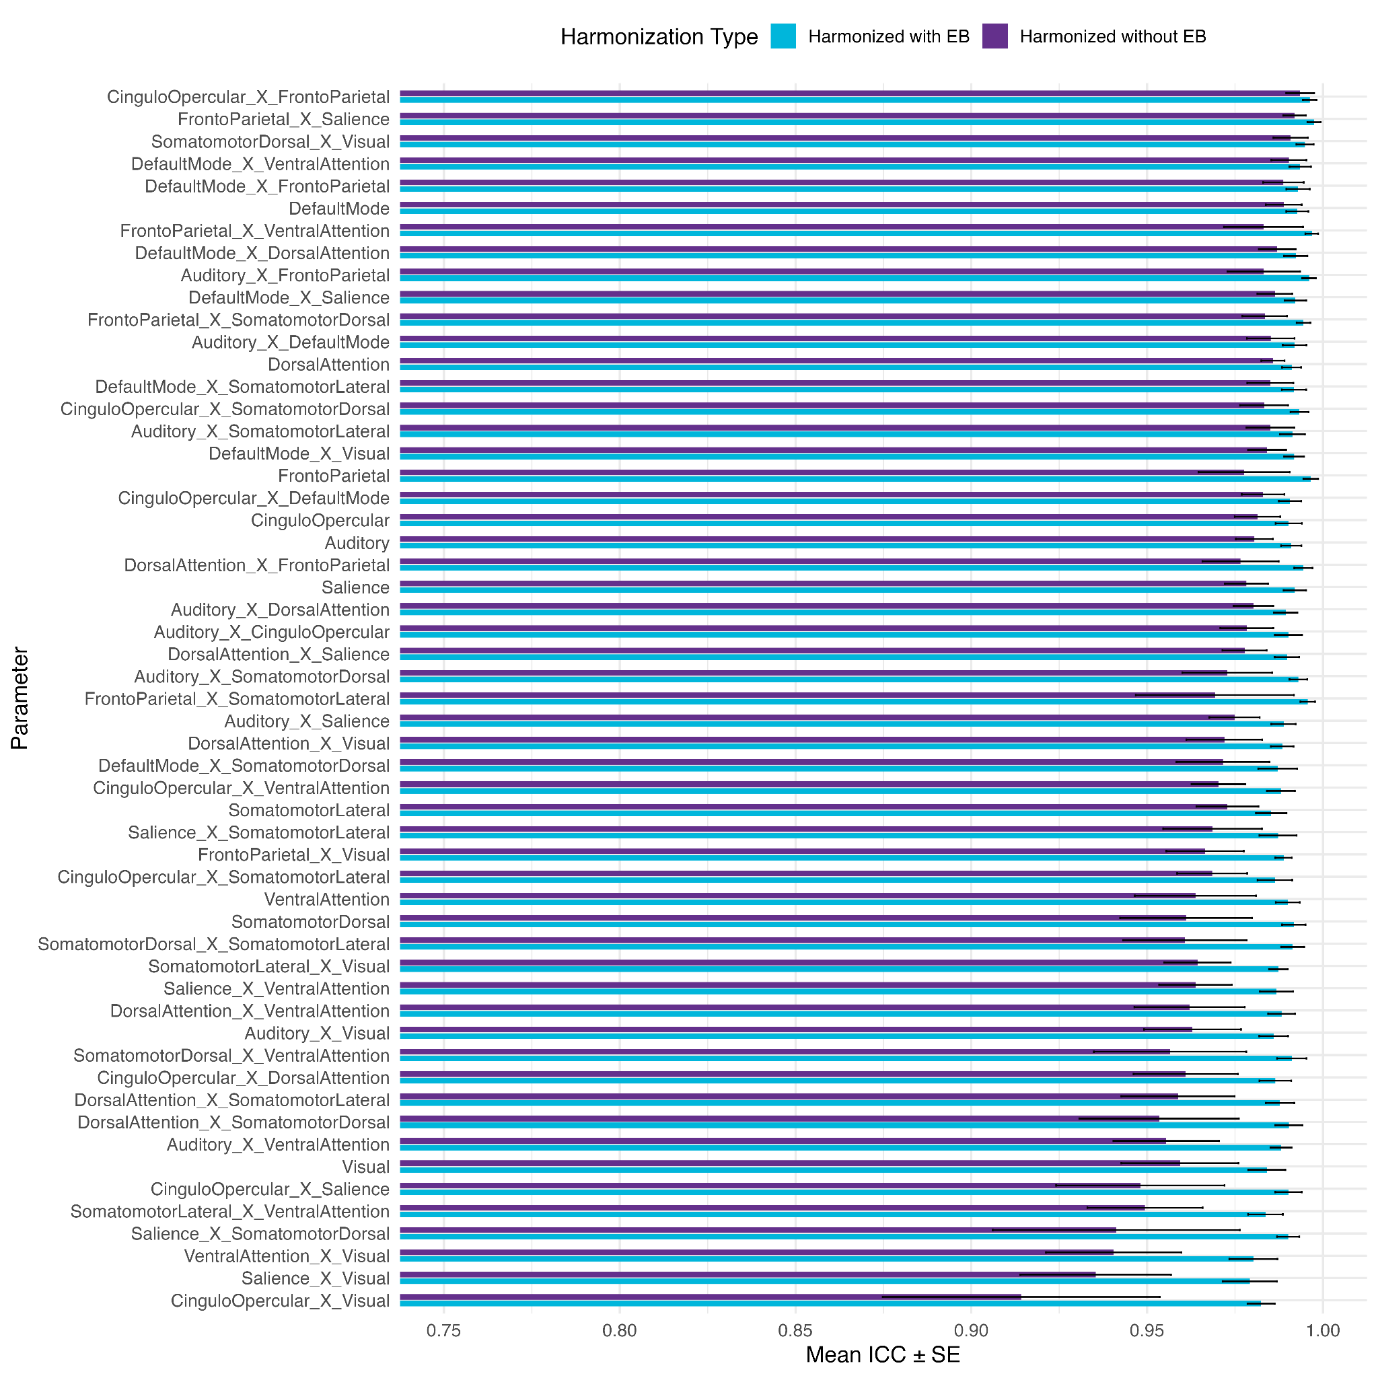


### 7.1.2 Supplementary Figure 2: Within-Site Consistency Across Sites After Harmonization

| 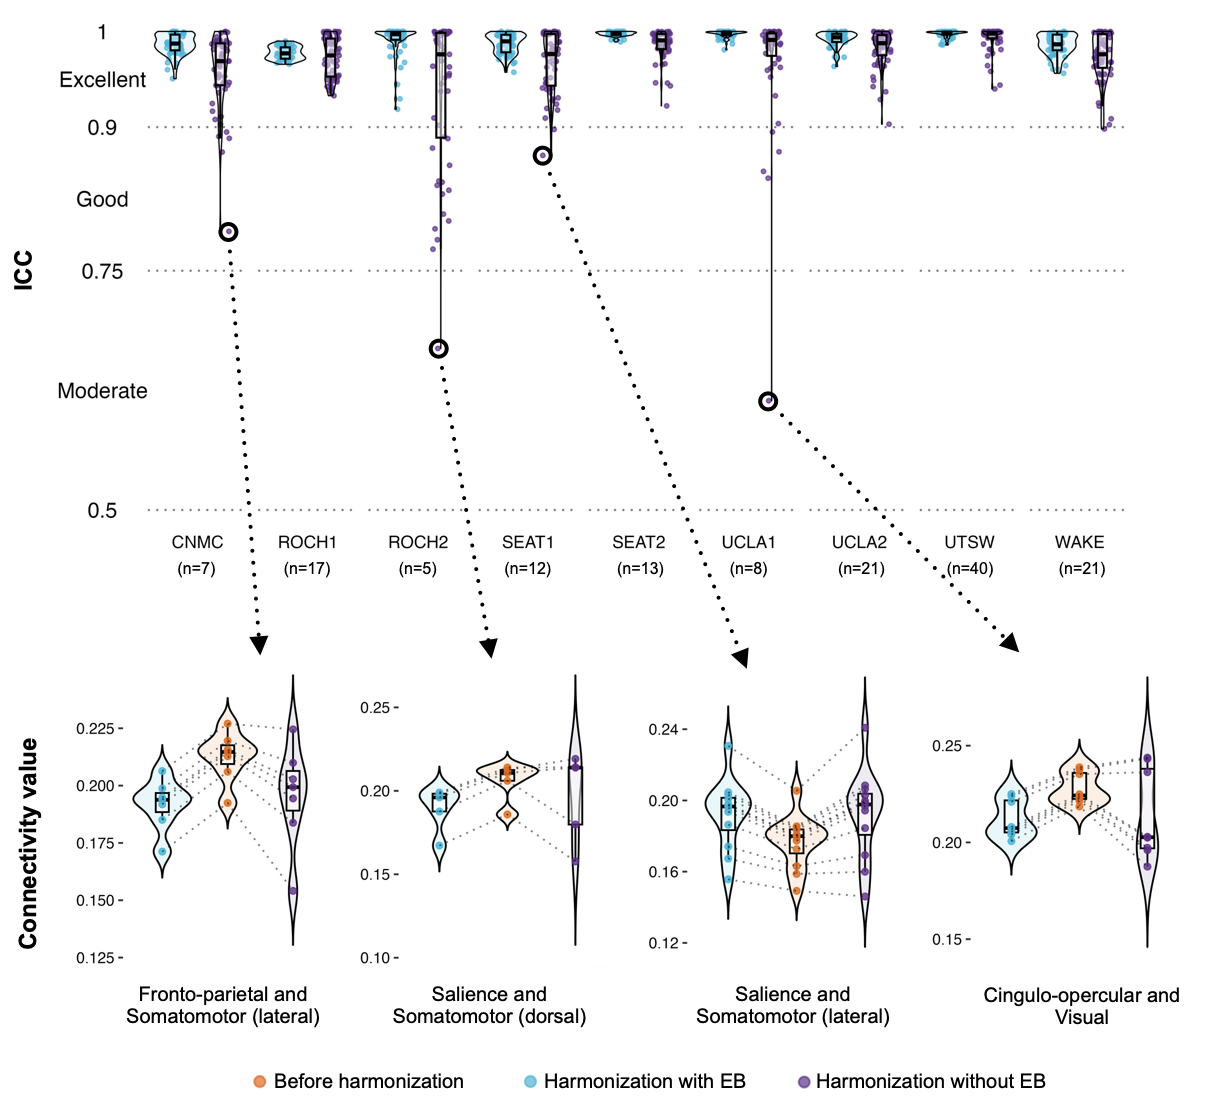 |
| --- |
| **Supplementary Figure 2** shows connectivity values in smaller sites. Within-site variability was better preserved when applying EB, with more similar distribution shapes and parallel connection lines indicative of preserved original variability. |

## 7.2 Supplementary Tables

### 7.2.1 Supplementary Table 1: Resting-State Network and ROI Assignments

| **Network** | **x** | **y** | **z** | **ROI label** |
| --- | --- | --- | --- | --- |
| Auditory | -51 | -24 | 22 | 69 |
| Auditory | 41 | -26 | 21 | 70 |
| Auditory | 56 | -21 | 30 | 71 |
| Auditory | -58 | -27 | 13 | 72 |
| Auditory | -53 | -12 | 12 | 73 |
| Auditory | -48 | -36 | 24 | 74 |
| Auditory | -47 | -28 | 5 | 75 |
| Auditory | -37 | -35 | 16 | 76 |
| Auditory | 30 | -29 | 14 | 77 |
| Auditory | 53 | -9 | 16 | 78 |
| Auditory | 55 | -19 | 10 | 79 |
| Auditory | 62 | -36 | 21 | 80 |
| CinguloOpercular | -49 | 5 | 0 | 50 |
| CinguloOpercular | -43 | -3 | 10 | 51 |
| CinguloOpercular | -33 | 0 | 6 | 52 |
| CinguloOpercular | -17 | -9 | 69 | 53 |
| CinguloOpercular | -11 | -6 | 42 | 54 |
| CinguloOpercular | -6 | 13 | 36 | 55 |
| CinguloOpercular | -4 | -2 | 53 | 56 |
| CinguloOpercular | 5 | 3 | 51 | 57 |
| CinguloOpercular | 11 | -6 | 69 | 58 |
| CinguloOpercular | 34 | 6 | 5 | 59 |
| CinguloOpercular | 35 | -3 | 0 | 60 |
| CinguloOpercular | 47 | 4 | 3 | 61 |
| CinguloOpercular | -29 | -29 | 12 | 62 |
| CinguloOpercular | 39 | -5 | 48 | 63 |
| CinguloOpercular | 34 | 17 | 7 | 64 |
| CinguloOpercular | -38 | 45 | 21 | 65 |
| CinguloOpercular | 29 | 27 | 30 | 66 |
| CinguloOpercular | 29 | 49 | 20 | 67 |
| CinguloOpercular | 35 | 27 | 3 | 68 |
| CinguloOpercular | 24 | 1 | 10 | 258 |
| CinguloOpercular | -24 | 4 | 10 | 259 |
| CinguloOpercular | 18 | -8 | -1 | 260 |
| CinguloOpercular | -18 | -8 | -1 | 261 |
| CinguloOpercular | 12 | -17 | 13 | 266 |
| CinguloOpercular | -15 | -17 | 13 | 267 |
| CinguloOpercular | 9 | -11 | 4 | 268 |
| CinguloOpercular | -9 | -13 | 2 | 269 |
| CinguloOpercular | 31.69 | -49.51 | -47.73 | 274 |
| CinguloOpercular | -30.33 | -50.75 | -48.25 | 294 |
| DefaultMode | -65 | -42 | -6 | 82 |
| DefaultMode | -55 | -31 | -4 | 83 |
| DefaultMode | -53 | -15 | -9 | 84 |
| DefaultMode | -50 | 0 | -24 | 85 |
| DefaultMode | -47 | -43 | 0 | 86 |
| DefaultMode | -44 | -61 | 18 | 87 |
| DefaultMode | -44 | 27 | -9 | 88 |
| DefaultMode | -43 | -65 | 31 | 89 |
| DefaultMode | -41 | 9 | -30 | 90 |
| DefaultMode | -39 | -75 | 22 | 91 |
| DefaultMode | -38 | -75 | 39 | 92 |
| DefaultMode | -35 | 15 | 51 | 93 |
| DefaultMode | -20 | 39 | 42 | 94 |
| DefaultMode | -20 | 57 | 24 | 95 |
| DefaultMode | -17 | 57 | -3 | 96 |
| DefaultMode | -17 | 23 | 54 | 97 |
| DefaultMode | -12 | -41 | 1 | 98 |
| DefaultMode | -11 | -57 | 14 | 99 |
| DefaultMode | -11 | 33 | 54 | 100 |
| DefaultMode | -11 | 48 | 42 | 101 |
| DefaultMode | -11 | 39 | 12 | 102 |
| DefaultMode | -8 | 42 | 27 | 103 |
| DefaultMode | -7 | -56 | 25 | 104 |
| DefaultMode | -7 | 45 | 4 | 105 |
| DefaultMode | -3 | -50 | 12 | 106 |
| DefaultMode | -3 | -39 | 42 | 107 |
| DefaultMode | -3 | 39 | -4 | 108 |
| DefaultMode | -3 | 32 | 39 | 109 |
| DefaultMode | -3 | 36 | 20 | 110 |
| DefaultMode | 5 | 60 | 3 | 111 |
| DefaultMode | 5 | -60 | 33 | 112 |
| DefaultMode | 5 | 48 | 21 | 113 |
| DefaultMode | 5 | 57 | 27 | 114 |
| DefaultMode | 7 | -50 | 29 | 115 |
| DefaultMode | 7 | 37 | 0 | 116 |
| DefaultMode | 8 | 42 | -9 | 117 |
| DefaultMode | 8 | 48 | 9 | 118 |
| DefaultMode | 10 | -55 | 16 | 119 |
| DefaultMode | 11 | 48 | 42 | 120 |
| DefaultMode | 11 | 24 | 60 | 121 |
| DefaultMode | 11 | 30 | 24 | 122 |
| DefaultMode | 14 | -64 | 24 | 123 |
| DefaultMode | 20 | 33 | 42 | 124 |
| DefaultMode | 21 | 27 | 50 | 125 |
| DefaultMode | 41 | -73 | 26 | 126 |
| DefaultMode | 44 | 12 | -24 | 127 |
| DefaultMode | 44 | -52 | 28 | 128 |
| DefaultMode | 47 | 30 | -6 | 129 |
| DefaultMode | 49 | -61 | 34 | 130 |
| DefaultMode | 50 | -6 | -12 | 131 |
| DefaultMode | 50 | 3 | -24 | 132 |
| DefaultMode | 62 | -15 | -15 | 133 |
| DefaultMode | 62 | -33 | -6 | 134 |
| DefaultMode | -32 | -39 | -15 | 135 |
| DefaultMode | -24 | -40 | -2 | 238 |
| DefaultMode | 24 | -39 | -1 | 239 |
| DefaultMode | 3 | -11 | 10 | 262 |
| DefaultMode | -3 | -13 | 10 | 263 |
| DefaultMode | -29.53 | -76.64 | -38.36 | 277 |
| DefaultMode | 31.53 | -80.15 | -37.19 | 278 |
| DefaultMode | -22.12 | -74.98 | -28.62 | 279 |
| DefaultMode | 23.67 | -75.48 | -27.62 | 280 |
| DefaultMode | -4.5 | -51 | -39 | 281 |
| DefaultMode | 8.56 | -50.39 | -37.87 | 282 |
| DorsalAttention | -26 | -71 | 33 | 220 |
| DorsalAttention | -35 | -30 | -24 | 221 |
| DorsalAttention | 44 | -48 | -15 | 222 |
| DorsalAttention | 9 | -41 | 48 | 223 |
| DorsalAttention | -50 | -63 | 3 | 224 |
| DorsalAttention | -40 | -60 | -10 | 225 |
| DorsalAttention | -32 | -48 | 44 | 226 |
| DorsalAttention | -32 | -5 | 53 | 227 |
| DorsalAttention | -17 | -60 | 60 | 228 |
| DorsalAttention | 8 | -63 | 57 | 229 |
| DorsalAttention | 20 | -66 | 45 | 230 |
| DorsalAttention | 23 | -60 | 57 | 231 |
| DorsalAttention | 26 | -9 | 54 | 232 |
| DorsalAttention | 44 | -60 | 4 | 233 |
| DorsalAttention | -11.25 | -51.91 | -47.89 | 275 |
| DorsalAttention | 14.53 | -48.36 | -49 | 276 |
| FrontoParietal | -51 | -50 | 39 | 175 |
| FrontoParietal | -45 | 7 | 24 | 176 |
| FrontoParietal | -43 | -2 | 45 | 177 |
| FrontoParietal | -41 | 33 | 24 | 178 |
| FrontoParietal | -41 | -56 | 41 | 179 |
| FrontoParietal | -41 | 20 | 31 | 180 |
| FrontoParietal | -40 | 2 | 33 | 181 |
| FrontoParietal | -40 | 40 | 2 | 182 |
| FrontoParietal | -33 | 49 | 9 | 183 |
| FrontoParietal | -28 | -59 | 44 | 184 |
| FrontoParietal | -23 | 6 | 63 | 185 |
| FrontoParietal | -4 | 21 | 46 | 186 |
| FrontoParietal | 23 | 39 | -9 | 187 |
| FrontoParietal | 29 | 9 | 57 | 188 |
| FrontoParietal | 31 | -55 | 42 | 189 |
| FrontoParietal | 32 | 48 | -6 | 190 |
| FrontoParietal | 35 | -66 | 38 | 191 |
| FrontoParietal | 36 | 37 | 20 | 192 |
| FrontoParietal | 37 | 13 | 42 | 193 |
| FrontoParietal | 41 | -55 | 45 | 194 |
| FrontoParietal | 41 | 43 | 4 | 195 |
| FrontoParietal | 44 | 5 | 35 | 196 |
| FrontoParietal | 45 | 19 | 30 | 197 |
| FrontoParietal | 46 | -45 | 44 | 198 |
| FrontoParietal | 56 | -54 | -12 | 199 |
| FrontoParietal | 45 | 17 | 14 | 200 |
| FrontoParietal | 52 | -47 | 36 | 201 |
| FrontoParietal | 13 | -5 | 20 | 250 |
| FrontoParietal | -15 | -5 | 20 | 251 |
| FrontoParietal | -8.75 | -77.03 | -28.43 | 284 |
| FrontoParietal | 10.32 | -77.24 | -28.02 | 285 |
| FrontoParietal | -31.25 | -70.75 | -47.53 | 286 |
| FrontoParietal | 33.62 | -71.45 | -46.11 | 287 |
| FrontoParietal | -28.31 | -65.37 | -30.09 | 288 |
| FrontoParietal | 31 | -63 | -29 | 289 |
| Salience | -34 | 16 | 3 | 202 |
| Salience | -27 | 46 | 25 | 203 |
| Salience | -11 | 21 | 27 | 204 |
| Salience | -2 | 10 | 45 | 205 |
| Salience | -1 | 25 | 30 | 206 |
| Salience | 4 | 18 | 39 | 207 |
| Salience | 9 | 17 | 30 | 208 |
| Salience | 24 | 43 | 31 | 209 |
| Salience | 32 | 12 | -3 | 210 |
| Salience | 11 | 13 | 10 | 248 |
| Salience | -13 | 13 | 10 | 249 |
| Salience | 42.25 | -60.44 | -28.22 | 291 |
| Salience | -40.74 | -59.53 | -30.03 | 292 |
| SomatomotorDorsal | -8 | -54 | 57 | 13 |
| SomatomotorDorsal | -1 | -18 | 46 | 14 |
| SomatomotorDorsal | -52 | -25 | 41 | 15 |
| SomatomotorDorsal | -44 | -34 | 44 | 16 |
| SomatomotorDorsal | -39 | -22 | 52 | 17 |
| SomatomotorDorsal | -38 | -30 | 66 | 18 |
| SomatomotorDorsal | -38 | -18 | 66 | 19 |
| SomatomotorDorsal | -29 | -45 | 57 | 20 |
| SomatomotorDorsal | -23 | -33 | 69 | 21 |
| SomatomotorDorsal | -21 | -34 | 58 | 22 |
| SomatomotorDorsal | -17 | -48 | 69 | 23 |
| SomatomotorDorsal | -14 | -21 | 39 | 24 |
| SomatomotorDorsal | -14 | -21 | 72 | 25 |
| SomatomotorDorsal | -8 | -24 | 63 | 26 |
| SomatomotorDorsal | -8 | -36 | 69 | 27 |
| SomatomotorDorsal | 1 | -31 | 58 | 28 |
| SomatomotorDorsal | 2 | -21 | 57 | 29 |
| SomatomotorDorsal | 8 | -6 | 45 | 30 |
| SomatomotorDorsal | 8 | -48 | 69 | 31 |
| SomatomotorDorsal | 8 | -21 | 72 | 32 |
| SomatomotorDorsal | 11 | -36 | 72 | 33 |
| SomatomotorDorsal | 18 | -32 | 58 | 34 |
| SomatomotorDorsal | 20 | -45 | 66 | 35 |
| SomatomotorDorsal | 26 | -21 | 69 | 36 |
| SomatomotorDorsal | 26 | -42 | 57 | 37 |
| SomatomotorDorsal | 35 | -21 | 45 | 38 |
| SomatomotorDorsal | 39 | -24 | 54 | 39 |
| SomatomotorDorsal | 41 | -12 | 57 | 40 |
| SomatomotorDorsal | 44 | -33 | 48 | 41 |
| SomatomotorDorsal | 47 | -24 | 42 | 42 |
| SomatomotorDorsal | 17 | -12 | 63 | 43 |
| SomatomotorDorsal | 51 | -31 | 34 | 44 |
| SomatomotorDorsal | 27 | -11 | 10 | 252 |
| SomatomotorDorsal | -27 | -13 | 10 | 253 |
| SomatomotorDorsal | 15 | -25 | 10 | 272 |
| SomatomotorDorsal | -18 | -25 | 10 | 273 |
| SomatomotorDorsal | -4.66 | -73.04 | -41.38 | 295 |
| SomatomotorDorsal | 8.15 | -71.32 | -38.15 | 296 |
| SomatomotorDorsal | -11.01 | -44.84 | -17.14 | 299 |
| SomatomotorDorsal | 11.89 | -45.09 | -16.64 | 300 |
| SomatomotorLateral | -51 | -13 | 24 | 45 |
| SomatomotorLateral | -48 | -14 | 34 | 46 |
| SomatomotorLateral | 34 | -13 | 16 | 47 |
| SomatomotorLateral | 48 | -10 | 34 | 48 |
| SomatomotorLateral | 62 | -12 | 27 | 49 |
| SomatomotorLateral | 27 | -10 | -2 | 254 |
| SomatomotorLateral | -27 | -13 | -2 | 255 |
| SomatomotorLateral | 13 | -22 | 2 | 270 |
| SomatomotorLateral | -13 | -22 | 2 | 271 |
| SomatomotorLateral | -9.03 | -61.98 | -18.09 | 297 |
| SomatomotorLateral | 10.05 | -62.19 | -17.67 | 298 |
| VentralAttention | 49 | -31 | -2 | 211 |
| VentralAttention | -54 | -51 | 8 | 212 |
| VentralAttention | -53 | -41 | 12 | 213 |
| VentralAttention | 49 | -35 | 9 | 214 |
| VentralAttention | 53 | -48 | 12 | 215 |
| VentralAttention | -47 | 21 | 2 | 216 |
| VentralAttention | -11 | 6 | 66 | 217 |
| VentralAttention | 50 | 27 | 6 | 218 |
| VentralAttention | 51 | -45 | 22 | 219 |
| VentralAttention | 24 | -2 | 2 | 256 |
| VentralAttention | -27 | -4 | -1 | 257 |
| Visual | -11 | -93 | -15 | 141 |
| Visual | 8 | -90 | -9 | 142 |
| Visual | 17 | -90 | -15 | 143 |
| Visual | -44 | -75 | -12 | 144 |
| Visual | -40 | -73 | -2 | 145 |
| Visual | -38 | -87 | -9 | 146 |
| Visual | -31 | -78 | -15 | 147 |
| Visual | -27 | -79 | 16 | 148 |
| Visual | -25 | -89 | 0 | 149 |
| Visual | -23 | -90 | 15 | 150 |
| Visual | -17 | -68 | 3 | 151 |
| Visual | -16 | -77 | 30 | 152 |
| Visual | -15 | -53 | -2 | 153 |
| Visual | -14 | -72 | -9 | 154 |
| Visual | -14 | -90 | 27 | 155 |
| Visual | -8 | -80 | 5 | 156 |
| Visual | -3 | -81 | 18 | 157 |
| Visual | 5 | -72 | 21 | 158 |
| Visual | 6 | -81 | 4 | 159 |
| Visual | 8 | -72 | 9 | 160 |
| Visual | 14 | -87 | 33 | 161 |
| Visual | 14 | -77 | 28 | 162 |
| Visual | 17 | -48 | -9 | 163 |
| Visual | 19 | -66 | 1 | 164 |
| Visual | 19 | -85 | -4 | 165 |
| Visual | 23 | -87 | 21 | 166 |
| Visual | 25 | -79 | -16 | 167 |
| Visual | 26 | -60 | -9 | 168 |
| Visual | 27 | -77 | 23 | 169 |
| Visual | 35 | -84 | 11 | 170 |
| Visual | 35 | -81 | 0 | 171 |
| Visual | 38 | -73 | 13 | 172 |
| Visual | 40 | -66 | -8 | 173 |
| Visual | 41 | -78 | -12 | 174 |
| Visual | 18 | -31 | 2 | 264 |
| Visual | -18 | -31 | 2 | 265 |
| Visual | 0.71 | -73.38 | -25.17 | 283 |

### 7.2.2 Supplementary Table 2: Site Effects in Within- and Between-Network Functional Connectivity Before and After Harmonization

| **Parameter** | **Before harmonization** | | | **Harmonization with EB** | | | **Harmonization without EB** | | |
| --- | --- | --- | --- | --- | --- | --- | --- | --- | --- |
| **Statistic** | **Cohen's *f*** | ***η²*** | **Statistic** | **Cohen's *f*** | ***η²*** | **Statistic** | **Cohen's *f*** | ***η²*** |
| Auditory | F(8, 135) = 6.40, p < 0.001 | 0.62 | 0.28 | F(8, 135) = 0.58, p > 0.05 | 0.19 | 0.03 | F(8, 135) = 0.00, p > 0.05 | 0.01 | 0.00 |
| CinguloOpercular | F(8, 135) = 8.11, p < 0.001 | 0.69 | 0.33 | F(8, 135) = 0.18, p > 0.05 | 0.11 | 0.01 | F(8, 135) = 0.00, p > 0.05 | 0.02 | 0.00 |
| DefaultMode | F(8, 135) = 8.07, p < 0.001 | 0.69 | 0.32 | F(8, 135) = 0.09, p > 0.05 | 0.07 | 0.01 | F(8, 135) = 0.05, p > 0.05 | 0.05 | 0.00 |
| DorsalAttention | F(8, 135) = 2.10, p < 0.05 | 0.35 | 0.11 | F(8, 135) = 0.53, p > 0.05 | 0.18 | 0.03 | F(8, 135) = 0.09, p > 0.05 | 0.07 | 0.01 |
| FrontoParietal | F(8, 135) = 5.24, p < 0.001 | 0.56 | 0.24 | F(8, 135) = 0.23, p > 0.05 | 0.12 | 0.01 | F(8, 135) = 0.01, p > 0.05 | 0.02 | 0.00 |
| Salience | F(8, 135) = 9.99, p < 0.001 | 0.77 | 0.37 | F(8, 135) = 0.30, p > 0.05 | 0.13 | 0.02 | F(8, 135) = 0.06, p > 0.05 | 0.06 | 0.00 |
| SomatomotorDorsal | F(8, 135) = 5.65, p < 0.001 | 0.58 | 0.25 | F(8, 135) = 0.62, p > 0.05 | 0.19 | 0.04 | F(8, 135) = 0.03, p > 0.05 | 0.05 | 0.00 |
| SomatomotorLateral | F(8, 135) = 11.24, p < 0.001 | 0.82 | 0.40 | F(8, 135) = 0.52, p > 0.05 | 0.18 | 0.03 | F(8, 135) = 0.02, p > 0.05 | 0.03 | 0.00 |
| VentralAttention | F(8, 135) = 6.81, p < 0.001 | 0.64 | 0.29 | F(8, 135) = 0.17, p > 0.05 | 0.10 | 0.01 | F(8, 135) = 0.04, p > 0.05 | 0.05 | 0.00 |
| Visual | F(8, 135) = 6.52, p < 0.001 | 0.62 | 0.28 | F(8, 135) = 0.36, p > 0.05 | 0.15 | 0.02 | F(8, 135) = 0.00, p > 0.05 | 0.01 | 0.00 |
| Auditory_X_CinguloOpercular | F(8, 135) = 10.15, p < 0.001 | 0.78 | 0.38 | F(8, 135) = 0.33, p > 0.05 | 0.14 | 0.02 | F(8, 135) = 0.00, p > 0.05 | 0.01 | 0.00 |
| Auditory_X_DefaultMode | F(8, 135) = 8.52, p < 0.001 | 0.71 | 0.34 | F(8, 135) = 0.08, p > 0.05 | 0.07 | 0.01 | F(8, 135) = 0.06, p > 0.05 | 0.06 | 0.00 |
| Auditory_X_DorsalAttention | F(8, 135) = 5.13, p < 0.001 | 0.55 | 0.23 | F(8, 135) = 0.24, p > 0.05 | 0.12 | 0.01 | F(8, 135) = 0.05, p > 0.05 | 0.05 | 0.00 |
| Auditory_X_FrontoParietal | F(8, 135) = 6.42, p < 0.001 | 0.62 | 0.28 | F(8, 135) = 0.17, p > 0.05 | 0.10 | 0.01 | F(8, 135) = 0.01, p > 0.05 | 0.02 | 0.00 |
| Auditory_X_Salience | F(8, 135) = 10.02, p < 0.001 | 0.77 | 0.37 | F(8, 135) = 0.26, p > 0.05 | 0.12 | 0.02 | F(8, 135) = 0.00, p > 0.05 | 0.02 | 0.00 |
| Auditory_X_SomatomotorDorsal | F(8, 135) = 5.86, p < 0.001 | 0.59 | 0.26 | F(8, 135) = 0.34, p > 0.05 | 0.14 | 0.02 | F(8, 135) = 0.02, p > 0.05 | 0.04 | 0.00 |
| Auditory_X_SomatomotorLateral | F(8, 135) = 9.56, p < 0.001 | 0.75 | 0.36 | F(8, 135) = 0.53, p > 0.05 | 0.18 | 0.03 | F(8, 135) = 0.01, p > 0.05 | 0.03 | 0.00 |
| Auditory_X_VentralAttention | F(8, 135) = 10.20, p < 0.001 | 0.78 | 0.38 | F(8, 135) = 0.49, p > 0.05 | 0.17 | 0.03 | F(8, 135) = 0.00, p > 0.05 | 0.01 | 0.00 |
| Auditory_X_Visual | F(8, 135) = 7.09, p < 0.001 | 0.65 | 0.30 | F(8, 135) = 0.21, p > 0.05 | 0.11 | 0.01 | F(8, 135) = 0.00, p > 0.05 | 0.01 | 0.00 |
| CinguloOpercular_X_DefaultMode | F(8, 135) = 9.13, p < 0.001 | 0.74 | 0.35 | F(8, 135) = 0.08, p > 0.05 | 0.07 | 0.01 | F(8, 135) = 0.05, p > 0.05 | 0.06 | 0.00 |
| CinguloOpercular_X_DorsalAttention | F(8, 135) = 7.95, p < 0.001 | 0.69 | 0.32 | F(8, 135) = 0.09, p > 0.05 | 0.07 | 0.01 | F(8, 135) = 0.03, p > 0.05 | 0.04 | 0.00 |
| CinguloOpercular_X_FrontoParietal | F(8, 135) = 8.77, p < 0.001 | 0.72 | 0.34 | F(8, 135) = 0.10, p > 0.05 | 0.08 | 0.01 | F(8, 135) = 0.00, p > 0.05 | 0.02 | 0.00 |
| CinguloOpercular_X_Salience | F(8, 135) = 10.20, p < 0.001 | 0.78 | 0.38 | F(8, 135) = 0.17, p > 0.05 | 0.10 | 0.01 | F(8, 135) = 0.02, p > 0.05 | 0.03 | 0.00 |
| CinguloOpercular_X_SomatomotorDorsal | F(8, 135) = 9.72, p < 0.001 | 0.76 | 0.37 | F(8, 135) = 0.26, p > 0.05 | 0.12 | 0.02 | F(8, 135) = 0.02, p > 0.05 | 0.04 | 0.00 |
| CinguloOpercular_X_SomatomotorLateral | F(8, 135) = 12.38, p < 0.001 | 0.86 | 0.42 | F(8, 135) = 0.38, p > 0.05 | 0.15 | 0.02 | F(8, 135) = 0.00, p > 0.05 | 0.01 | 0.00 |
| CinguloOpercular_X_VentralAttention | F(8, 135) = 12.00, p < 0.001 | 0.84 | 0.42 | F(8, 135) = 0.37, p > 0.05 | 0.15 | 0.02 | F(8, 135) = 0.00, p > 0.05 | 0.01 | 0.00 |
| CinguloOpercular_X_Visual | F(8, 135) = 7.97, p < 0.001 | 0.69 | 0.32 | F(8, 135) = 0.11, p > 0.05 | 0.08 | 0.01 | F(8, 135) = 0.00, p > 0.05 | 0.01 | 0.00 |
| DefaultMode_X_DorsalAttention | F(8, 135) = 7.12, p < 0.001 | 0.65 | 0.30 | F(8, 135) = 0.11, p > 0.05 | 0.08 | 0.01 | F(8, 135) = 0.07, p > 0.05 | 0.06 | 0.00 |
| DefaultMode_X_FrontoParietal | F(8, 135) = 9.87, p < 0.001 | 0.77 | 0.37 | F(8, 135) = 0.08, p > 0.05 | 0.07 | 0.01 | F(8, 135) = 0.05, p > 0.05 | 0.06 | 0.00 |
| DefaultMode_X_Salience | F(8, 135) = 9.89, p < 0.001 | 0.77 | 0.37 | F(8, 135) = 0.10, p > 0.05 | 0.08 | 0.01 | F(8, 135) = 0.05, p > 0.05 | 0.05 | 0.00 |
| DefaultMode_X_SomatomotorDorsal | F(8, 135) = 10.32, p < 0.001 | 0.78 | 0.38 | F(8, 135) = 0.18, p > 0.05 | 0.10 | 0.01 | F(8, 135) = 0.06, p > 0.05 | 0.06 | 0.00 |
| DefaultMode_X_SomatomotorLateral | F(8, 135) = 9.81, p < 0.001 | 0.76 | 0.37 | F(8, 135) = 0.12, p > 0.05 | 0.09 | 0.01 | F(8, 135) = 0.05, p > 0.05 | 0.06 | 0.00 |
| DefaultMode_X_VentralAttention | F(8, 135) = 9.14, p < 0.001 | 0.74 | 0.35 | F(8, 135) = 0.11, p > 0.05 | 0.08 | 0.01 | F(8, 135) = 0.03, p > 0.05 | 0.05 | 0.00 |
| DefaultMode_X_Visual | F(8, 135) = 7.51, p < 0.001 | 0.67 | 0.31 | F(8, 135) = 0.11, p > 0.05 | 0.08 | 0.01 | F(8, 135) = 0.02, p > 0.05 | 0.04 | 0.00 |
| DorsalAttention_X_FrontoParietal | F(8, 135) = 6.35, p < 0.001 | 0.61 | 0.27 | F(8, 135) = 0.13, p > 0.05 | 0.09 | 0.01 | F(8, 135) = 0.03, p > 0.05 | 0.04 | 0.00 |
| DorsalAttention_X_Salience | F(8, 135) = 7.25, p < 0.001 | 0.66 | 0.30 | F(8, 135) = 0.11, p > 0.05 | 0.08 | 0.01 | F(8, 135) = 0.07, p > 0.05 | 0.06 | 0.00 |
| DorsalAttention_X_SomatomotorDorsal | F(8, 135) = 6.59, p < 0.001 | 0.63 | 0.28 | F(8, 135) = 0.43, p > 0.05 | 0.16 | 0.03 | F(8, 135) = 0.04, p > 0.05 | 0.05 | 0.00 |
| DorsalAttention_X_SomatomotorLateral | F(8, 135) = 7.31, p < 0.001 | 0.66 | 0.30 | F(8, 135) = 0.22, p > 0.05 | 0.11 | 0.01 | F(8, 135) = 0.05, p > 0.05 | 0.05 | 0.00 |
| DorsalAttention_X_VentralAttention | F(8, 135) = 5.73, p < 0.001 | 0.58 | 0.25 | F(8, 135) = 0.16, p > 0.05 | 0.10 | 0.01 | F(8, 135) = 0.06, p > 0.05 | 0.06 | 0.00 |
| DorsalAttention_X_Visual | F(8, 135) = 6.63, p < 0.001 | 0.63 | 0.28 | F(8, 135) = 0.20, p > 0.05 | 0.11 | 0.01 | F(8, 135) = 0.01, p > 0.05 | 0.02 | 0.00 |
| FrontoParietal_X_Salience | F(8, 135) = 8.36, p < 0.001 | 0.70 | 0.33 | F(8, 135) = 0.10, p > 0.05 | 0.08 | 0.01 | F(8, 135) = 0.01, p > 0.05 | 0.02 | 0.00 |
| FrontoParietal_X_SomatomotorDorsal | F(8, 135) = 7.38, p < 0.001 | 0.66 | 0.30 | F(8, 135) = 0.24, p > 0.05 | 0.12 | 0.01 | F(8, 135) = 0.02, p > 0.05 | 0.04 | 0.00 |
| FrontoParietal_X_SomatomotorLateral | F(8, 135) = 7.10, p < 0.001 | 0.65 | 0.30 | F(8, 135) = 0.07, p > 0.05 | 0.07 | 0.00 | F(8, 135) = 0.00, p > 0.05 | 0.01 | 0.00 |
| FrontoParietal_X_VentralAttention | F(8, 135) = 7.14, p < 0.001 | 0.65 | 0.30 | F(8, 135) = 0.09, p > 0.05 | 0.07 | 0.01 | F(8, 135) = 0.00, p > 0.05 | 0.01 | 0.00 |
| FrontoParietal_X_Visual | F(8, 135) = 8.14, p < 0.001 | 0.70 | 0.33 | F(8, 135) = 0.23, p > 0.05 | 0.12 | 0.01 | F(8, 135) = 0.00, p > 0.05 | 0.01 | 0.00 |
| Salience_X_SomatomotorDorsal | F(8, 135) = 7.09, p < 0.001 | 0.65 | 0.30 | F(8, 135) = 0.44, p > 0.05 | 0.16 | 0.03 | F(8, 135) = 0.05, p > 0.05 | 0.05 | 0.00 |
| Salience_X_SomatomotorLateral | F(8, 135) = 15.67, p < 0.001 | 0.96 | 0.48 | F(8, 135) = 0.44, p > 0.05 | 0.16 | 0.03 | F(8, 135) = 0.00, p > 0.05 | 0.01 | 0.00 |
| Salience_X_VentralAttention | F(8, 135) = 13.84, p < 0.001 | 0.91 | 0.45 | F(8, 135) = 0.38, p > 0.05 | 0.15 | 0.02 | F(8, 135) = 0.01, p > 0.05 | 0.03 | 0.00 |
| Salience_X_Visual | F(8, 135) = 6.66, p < 0.001 | 0.63 | 0.28 | F(8, 135) = 0.26, p > 0.05 | 0.12 | 0.02 | F(8, 135) = 0.00, p > 0.05 | 0.01 | 0.00 |
| SomatomotorDorsal_X_SomatomotorLateral | F(8, 135) = 6.96, p < 0.001 | 0.64 | 0.29 | F(8, 135) = 0.62, p > 0.05 | 0.19 | 0.04 | F(8, 135) = 0.02, p > 0.05 | 0.04 | 0.00 |
| SomatomotorDorsal_X_VentralAttention | F(8, 135) = 6.79, p < 0.001 | 0.63 | 0.29 | F(8, 135) = 0.45, p > 0.05 | 0.16 | 0.03 | F(8, 135) = 0.03, p > 0.05 | 0.04 | 0.00 |
| SomatomotorDorsal_X_Visual | F(8, 135) = 10.25, p < 0.001 | 0.78 | 0.38 | F(8, 135) = 0.37, p > 0.05 | 0.15 | 0.02 | F(8, 135) = 0.01, p > 0.05 | 0.03 | 0.00 |
| SomatomotorLateral_X_VentralAttention | F(8, 135) = 14.01, p < 0.001 | 0.91 | 0.45 | F(8, 135) = 0.57, p > 0.05 | 0.18 | 0.03 | F(8, 135) = 0.03, p > 0.05 | 0.04 | 0.00 |
| SomatomotorLateral_X_Visual | F(8, 135) = 7.10, p < 0.001 | 0.65 | 0.30 | F(8, 135) = 0.23, p > 0.05 | 0.12 | 0.01 | F(8, 135) = 0.01, p > 0.05 | 0.02 | 0.00 |
| VentralAttention_X_Visual | F(8, 135) = 6.46, p < 0.001 | 0.62 | 0.28 | F(8, 135) = 0.26, p > 0.05 | 0.12 | 0.02 | F(8, 135) = 0.00, p > 0.05 | 0.01 | 0.00 |
